# Supplementary material
Source: Springer Nature journal article supplement (https://www.springermedizin.de/resource/supplementary/13012_2010_333_MOESM7_ESM.pdf/9629794)
Supplement: MOESM7 [file 9629794]

Electronic databases  
[Cochrane database of Systematic Reviews, Cochrane Central Register of Controlled Trials, CINAHL, MEDLINE, EMBASE, HAPI, Web of Science, SCOPUS, OCLC PapersFirst, OCLC WorldCat, ABI Inform, Sociological Abstracts, Dissertation Abstracts]

24,364 Titles and abstracts

Duplicate Citations excluded (11,947)

12,418 Titles and Abstracts Screened

Excluded on screening (12,284)

133 Full-Texts Retrieved

Excluded – did meet inclusion criteria (78)

55 Articles remained and analyzed
